# Supplementary material
Source: ML conference proceedings conference paper supplement (https://proceedings.mlr.press/v32/defazio14.html)
Supplement: Supplementary file 1 [file defazio14-supp.zip]

# Appendix

## 1 Basic convexity inequalities

The following inequalities are classical. See Nesterov 1998 for proofs. They hold for all  $x$  &  $y$ , when  $f \in S_{s,L}^{1,1}$ .

$$\begin{aligned} \text{(B1)} \quad & f(y) \leq f(x) + \langle f'(x), y - x \rangle + \frac{L}{2} \|x - y\|^2 \\ \text{(B2)} \quad & f(y) \geq f(x) + \langle f'(x), y - x \rangle + \frac{1}{2L} \|f'(x) - f'(y)\|^2 \\ \text{(B3)} \quad & f(y) \geq f(x) + \langle f'(x), y - x \rangle + \frac{s}{2} \|x - y\|^2 \\ \text{(B4)} \quad & \langle f'(x) - f'(y), x - y \rangle \geq \frac{1}{L} \|f'(x) - f'(y)\|^2 \\ \text{(B5)} \quad & \langle f'(x) - f'(y), x - y \rangle \geq s \|x - y\|^2 \end{aligned}$$

We also use variants of B2 and B3 that are summed over each  $f_i$ , with  $x = \phi_i$  and  $y = w$ :

$$f(w) \geq \frac{1}{n} \sum_i f_i(\phi_i) + \frac{1}{n} \sum_i \langle f'_i(\phi_i), w - \phi_i \rangle + \frac{1}{2Ln} \sum_i \|f'(x) - f'(y)\|^2$$

$$f(w) \geq \frac{1}{n} \sum_i f_i(\phi_i) + \frac{1}{n} \sum_i \langle f'_i(\phi_i), w - \phi_i \rangle + \frac{s}{2n} \sum_i \|w - \phi_i\|^2$$

These are used in the following negated and rearranged form:

$$\begin{aligned} -f(w) - T_2 &= -f(w) + \frac{1}{n} \sum_i f_i(\phi_i) + \frac{1}{n} \sum_i \langle f'_i(\phi_i), w - \phi_i \rangle \\ \text{(B6)} \quad \therefore -f(w) - T_2 &\leq -\frac{s}{2n} \sum_i \|w - \phi_i\|^2 \end{aligned}$$

$$\text{(B7)} \quad -f(w) - T_2 \leq -\frac{1}{2Ln} \sum_i \|f'(w) - f'(\phi_i)\|^2.$$

## 2 Lyapunov term bounds

Simplifying each Lyapunov term is fairly straight forward. We use extensively that  $\phi_j^{(k+1)} = w$ , and that  $\phi_i^{(k+1)} = \phi_i$  for  $i \neq j$ . Note also that

$$\text{(B8)} \quad w^{(k+1)} - w = \frac{1}{n}(w - \phi_j) + \frac{1}{\alpha sn} [f'_j(\phi_j) - f'_j(w)].$$

**Lemma 6.** *Between steps  $k$  and  $k+1$ , the  $T_1 = f(\bar{\phi})$  term changes as follows:*

$$E[T_1^{(k+1)}] - T_1 \leq \frac{1}{n} \langle f'(\bar{\phi}), w - \bar{\phi} \rangle + \frac{L}{2n^3} \sum_i \|w - \phi_i\|^2.$$

*Proof.* First we use the standard Lipschitz upper bound (B1):

$$f(y) \leq f(x) + \langle f'(x), y - x \rangle + \frac{L}{2} \|x - y\|^2.$$

We can apply this using  $y = \bar{\phi}^{(k+1)} = \bar{\phi} + \frac{1}{n}(w - \phi_j)$  and  $x = \bar{\phi}$ :

$$f(\bar{\phi}^{(k+1)}) \leq f(\bar{\phi}) + \frac{1}{n} \langle f'(\bar{\phi}), w - \phi_j \rangle + \frac{L}{2n^2} \|w - \phi_j\|^2.$$

We now take expectations over  $j$ , giving:

$$E[f(\bar{\phi}^{(k+1)})] - f(\bar{\phi}) \leq \frac{1}{n} \langle f'(\bar{\phi}), w - \bar{\phi} \rangle + \frac{L}{2n^3} \sum_i \|w - \phi_i\|^2.$$

□

**Lemma 7.** *Between steps  $k$  and  $k+1$ , the  $T_2 = -\frac{1}{n} \sum_i f_i(\phi_i) - \frac{1}{n} \sum_i \langle f'_i(\phi_i), w - \phi_i \rangle$  term changes as follows:*

$$\begin{aligned} E[T_2^{(k+1)}] - T_2 &\leq -\frac{1}{n} T_2 - \frac{1}{n} f(w) \\ &+ \left(\frac{1}{\alpha} - \frac{\beta}{n}\right) \frac{1}{sn^3} \sum_i \|f'_i(w) - f'_i(\phi_i)\|^2 \\ &+ \frac{1}{n} \langle \bar{\phi} - w, f'(w) \rangle - \frac{1}{n^3} \sum_i \langle f'_i(w) - f'_i(\phi_i), w - \phi_i \rangle. \end{aligned}$$

*Proof.* We introduce the notation  $T_{21} = -\frac{1}{n} \sum_i f_i(\phi_i)$  and  $T_{22} = -\frac{1}{n} \sum_i \langle f'_i(\phi_i), w - \phi_i \rangle$ . We simplify the change in  $T_{21}$  first using  $\phi_j^{(k+1)} = w$ :

$$\begin{aligned} T_{21}^{(k+1)} - T_{21} &= -\frac{1}{n} \sum_i f_i(\phi_i^{(k+1)}) + \frac{1}{n} \sum_i f_i(\phi_i) \\ &= -\frac{1}{n} \sum_i f_i(\phi_i) + \frac{1}{n} f_j(\phi_j) - \frac{1}{n} f_j(w) + \frac{1}{n} \sum_i f_i(\phi_i) \\ &= \frac{1}{n} f_j(\phi_j) - \frac{1}{n} f_j(w) \end{aligned}$$

Now we simplify the change in  $T_{22}$ :

$$\begin{aligned} T_{22}^{(k+1)} - T_{22} &= -\frac{1}{n} \sum_i \left\langle f'_i(\phi_i^{(k+1)}), w^{(k+1)} - w + w - \phi_i^{(k+1)} \right\rangle - T_{22} \\ \therefore T_{22}^{(k+1)} - T_{22} &= -\frac{1}{n} \sum_i \left\langle f'_i(\phi_i^{(k+1)}), w - \phi_i^{(k+1)} \right\rangle - T_{22} - \frac{1}{n} \sum_i \left\langle f'_i(\phi_i^{(k+1)}), w^{(k+1)} - w \right\rangle. \end{aligned} \quad (1)$$

We now simplify the first two terms using  $\phi_j^{(k+1)} = w$ :

$$\begin{aligned} -\frac{1}{n} \sum_i \left\langle f'_i(\phi_i^{(k+1)}), w - \phi_i^{(k+1)} \right\rangle - T_{22} &= T_{22} - \frac{1}{n} \langle f'_j(\phi_j), w - \phi_j \rangle + \frac{1}{n} \langle f'_j(w), w - w \rangle - T_{22} \\ &= \frac{1}{n} \langle f'_j(\phi_j), w - \phi_j \rangle. \end{aligned}$$

The last term of Equation 1 expands further:

$$\begin{aligned} -\frac{1}{n} \sum_i \left\langle f'_i(\phi_i^{(k+1)}), w^{(k+1)} - w \right\rangle &= -\frac{1}{n} \left\langle \sum_i f'_i(\phi_i) - f'_j(\phi_j) + f'_j(w), w^{(k+1)} - w \right\rangle \\ &= -\frac{1}{n} \left\langle \sum_i f'_i(\phi_i), w^{(k+1)} - w \right\rangle - \frac{1}{n} \left\langle f'_j(w) - f'_j(\phi_j), w^{(k+1)} - w \right\rangle. \end{aligned} \quad (2)$$

The second inner product term in 2 simplifies further using B8:

$$\begin{aligned} -\frac{1}{n} \left\langle f'_j(w) - f'_j(\phi_j), w^{(k+1)} - w \right\rangle &= -\frac{1}{n} \left\langle f'_j(w) - f'_j(\phi_j), \frac{1}{n}(w - \phi_j) + \frac{1}{\alpha sn} [f'_j(\phi_j) - f'_j(w)] \right\rangle \\ &= -\frac{1}{n^2} \langle f'_j(w) - f'_j(\phi_j), w - \phi_j \rangle - \frac{1}{\alpha sn^2} \langle f'_j(w) - f'_j(\phi_j), f'_j(\phi_j) - f'_j(w) \rangle. \end{aligned}$$

We simplify the second term:

$$-\frac{1}{\alpha sn^2} \langle f'_j(w) - f'_j(\phi_j), f'_j(\phi_j) - f'_j(w) \rangle = \frac{1}{\alpha sn^2} \|f'_j(w) - f'_j(\phi_j)\|^2.$$

Grouping all remaining terms gives:

$$\begin{aligned} T_2^{(k+1)} - T_2 &\leq \frac{1}{n} f_j(\phi_j) + \frac{1}{n} \langle f'_j(\phi_j), w - \phi_j \rangle - \frac{1}{n} f_j(w) \\ &\quad + \frac{1}{\alpha sn^2} \|f'_j(w) - f'_j(\phi_j)\|^2 - \frac{1}{n^2} \langle f'_j(w) - f'_j(\phi_j), w - \phi_j \rangle \\ &\quad - \frac{1}{n} \left\langle \sum_i f'_i(\phi_i), w^{(k+1)} - w \right\rangle. \end{aligned}$$

We now take expectations of each remaining term. For the bottom inner product we use Lemma 1:

$$\begin{aligned} -\frac{1}{n} \left\langle \sum_i f'_i(\phi_i), w^{(k+1)} - w \right\rangle &= \frac{1}{\alpha sn^2} \left\langle \sum_i f'_i(\phi_i), f'(w) \right\rangle \\ &= \frac{1}{n} \langle \bar{\phi} - w, f'(w) \rangle. \end{aligned}$$

Taking expectations of the remaining terms is straight forward. We get:

$$\begin{aligned} E[T_2^{(k+1)}] - T_2 &\leq \frac{1}{n^2} \sum_i f_i(\phi_i) - \frac{1}{n} f(w) + \frac{1}{n^2} \sum_i \langle f'_i(\phi_i), w - \phi_i \rangle \\ &\quad + \frac{1}{\alpha sn^3} \sum_i \|f'_i(w) - f'_i(\phi_i)\|^2 - \frac{1}{n^3} \sum_i \langle f'_i(w) - f'_i(\phi_i), w - \phi_i \rangle \\ &\quad + \frac{1}{n} \langle \bar{\phi} - w, f'(w) \rangle. \end{aligned}$$

□

**Lemma 8.** *Between steps  $k$  and  $k+1$ , the  $T_3 = -\frac{s}{2n} \sum_i \|w - \phi_i\|^2$  term changes as follows:*

$$\begin{aligned} E[T_3^{(k+1)}] - T_3 &= -(1 + \frac{1}{n}) \frac{1}{n} T_3 \\ &\quad + \frac{1}{\alpha n} \langle f'(w), w - \bar{\phi} \rangle - \frac{1}{2\alpha^2 sn^3} \sum_i \|f'_i(\phi_i) - f'_i(w)\|^2. \end{aligned}$$

*Proof.* We expand as:

$$\begin{aligned} T_3^{(k+1)} &= -\frac{s}{2n} \sum_i \|w^{(k+1)} - \phi_i^{(k+1)}\|^2 \\ &= -\frac{s}{2n} \sum_i \|w^{(k+1)} - w + w - \phi_i^{(k+1)}\|^2 \end{aligned} \tag{3}$$

$$= -\frac{s}{2} \|w^{(k+1)} - w\|^2 - \frac{s}{2n} \sum_i \|w - \phi_i^{(k+1)}\|^2 - \frac{s}{n} \sum_i \langle w^{(k+1)} - w, w - \phi_i^{(k+1)} \rangle. \tag{4}$$

We expand the three terms on the right separately. For the first term:

$$\begin{aligned} -\frac{s}{2} \|w^{(k+1)} - w\|^2 &= -\frac{s}{2} \left\| \frac{1}{n} (w - \phi_j) + \frac{1}{\alpha sn} (f_j(\phi_j) - f_j(w)) \right\|^2 \\ &= -\frac{s}{2n^2} \|w - \phi_j\|^2 - \frac{1}{2\alpha^2 sn^2} \|f_j(\phi_j) - f_j(w)\|^2 \\ &\quad - \frac{1}{\alpha n^2} \langle f_j(\phi_j) - f_j(w), w - \phi_j \rangle. \end{aligned} \tag{5}$$

For the second term of Equation 4, using  $\phi_j^{(k+1)} = w$ :

$$\begin{aligned} -\frac{s}{2n} \sum_i \left\| w - \phi_i^{(k+1)} \right\|^2 &= -\frac{s}{2n} \sum_i \|w - \phi_i\|^2 + \frac{s}{2n} \|w - \phi_j\|^2 \\ &= T_3 + \frac{s}{2n} \|w - \phi_j\|^2. \end{aligned}$$

For the third term of Equation 4:

$$\begin{aligned} -\frac{s}{n} \sum_i \left\langle w^{(k+1)} - w, w - \phi_i^{(k+1)} \right\rangle &= -\frac{s}{n} \sum_i \left\langle w^{(k+1)} - w, w - \phi_i \right\rangle + \frac{s}{n} \left\langle w^{(k+1)} - w, w - \phi_j \right\rangle \\ &= -s \left\langle w^{(k+1)} - w, w - \frac{1}{n} \sum_i \phi_i \right\rangle + \frac{s}{n} \left\langle w^{(k+1)} - w, w - \phi_j \right\rangle. \end{aligned} \quad (6)$$

The second inner product term in Equation 6 becomes (using B8):

$$\begin{aligned} \frac{s}{n} \left\langle w^{(k+1)} - w, w - \phi_j \right\rangle &= \frac{s}{n} \left\langle \frac{1}{n} (w - \phi_j) + \frac{1}{\alpha s n} [f'_j(\phi_j) - f'_j(w)], w - \phi_j \right\rangle \\ &= \frac{s}{n^2} \|w - \phi_j\|^2 + \frac{1}{\alpha n^2} \langle f'_j(\phi_j) - f'_j(w), w - \phi_j \rangle. \end{aligned}$$

Notice that the inner product term here cancels with the one in 5.

Now we can take expectations of each remaining term. Recall that  $E[w^{(k+1)}] - w = -\frac{1}{\alpha s n} f'(w)$ , so the first inner product term in 6 becomes:

$$-s E \left[ \left\langle w^{(k+1)} - w, w - \frac{1}{n} \sum_i \phi_i \right\rangle \right] = \frac{1}{\alpha n} \langle f'(w), w - \bar{\phi} \rangle.$$

All other terms don't simplify under expectations. So the result is:

$$\begin{aligned} E[T_3^{(k+1)}] - T_3 &= \left(\frac{1}{2} - \frac{1}{n}\right) \frac{s}{n^2} \sum_i \|w - \phi_i\|^2 \\ &\quad + \frac{1}{\alpha n} \langle f'(w), w - \bar{\phi} \rangle - \frac{1}{2\alpha^2 s n^3} \sum_i \|f_i(\phi_i) - f_i(w)\|^2. \end{aligned}$$

□

**Lemma 9.** *Between steps  $k$  and  $k+1$ , the  $T_4 = \frac{s}{2n} \sum_i \|\bar{\phi} - \phi_i\|^2$  term changes as follows:*

$$E[T_4^{(k+1)}] - T_4 = -\frac{s}{2n^2} \sum_i \|\bar{\phi} - \phi_i\|^2 + \frac{s}{2n} \|\bar{\phi} - w\|^2 - \frac{s}{2n^3} \sum_i \|w - \phi_i\|^2.$$

*Proof.* Note that  $\bar{\phi}^{(k+1)} - \bar{\phi} = \frac{1}{n}(w - \phi_j)$ , so:

$$\begin{aligned} T_4^{(k+1)} &= \frac{s}{2n} \sum_i \left\| \bar{\phi}^{(k+1)} - \bar{\phi} + \bar{\phi} - \phi_i^{(k+1)} \right\|^2 \\ &= \frac{s}{2n} \sum_i \left( \left\| \bar{\phi}^{(k+1)} - \bar{\phi} \right\|^2 + \left\| \bar{\phi} - \phi_i^{(k+1)} \right\|^2 + 2 \left\langle \bar{\phi}^{(k+1)} - \bar{\phi}, \bar{\phi} - \phi_i^{(k+1)} \right\rangle \right) \\ &= \frac{s}{2n} \sum_i \left( \left\| \frac{1}{n}(w - \phi_j) \right\|^2 + \left\| \bar{\phi} - \phi_i^{(k+1)} \right\|^2 + \frac{2}{n} \left\langle w - \phi_j, \bar{\phi} - \phi_i^{(k+1)} \right\rangle \right). \end{aligned}$$

Now using  $\frac{1}{n} \sum_i (\bar{\phi} - \phi_i^{(k+1)}) = \bar{\phi} - \bar{\phi}^{(k+1)} = -\frac{1}{n}(w - \phi_j)$  to simplify the inner product term:

$$= \frac{s}{2n^2} \|w - \phi_j\|^2 + \frac{s}{2n} \sum_i \left\| \bar{\phi} - \phi_i^{(k+1)} \right\|^2 + \frac{s}{n^2} \langle w - \phi_j, \phi_j - w \rangle$$

$$\begin{aligned}
&= \frac{s}{2n^2} \|w - \phi_j\|^2 + \frac{s}{2n} \sum_i \left\| \bar{\phi} - \phi_i^{(k+1)} \right\|^2 - \frac{s}{n} \|w - \phi_j\|^2 \\
&= \frac{s}{2n} \sum_i \left\| \bar{\phi} - \phi_i^{(k+1)} \right\|^2 - \frac{s}{2n} \|w - \phi_j\|^2 \\
&= \frac{s}{2n} \sum_i \left\| \bar{\phi} - \phi_i \right\|^2 - \frac{s}{2n} \left\| \bar{\phi} - \phi_j \right\|^2 + \frac{s}{2n} \left\| \bar{\phi} - w \right\|^2 - \frac{s}{2n^2} \|w - \phi_j\|^2.
\end{aligned} \tag{7}$$

Taking expectations gives the result.  $\square$

**Lemma 10.** *Let  $f \in S_{s,L}$ . Then we have:*

$$f(x) \geq f(y) + \langle f'(y), x - y \rangle + \frac{1}{2(L-s)} \|f'(x) - f'(y)\|^2 + \frac{sL}{2(L-s)} \|y - x\|^2 + \frac{s}{(L-s)} \langle f'(x) - f'(y), y - x \rangle.$$

*Proof.* Define the function  $g$  as  $g(x) = f(x) - \frac{s}{2} \|x\|^2$ . Then the gradient is  $g'(x) = f'(x) - sx$ .  $g$  has a lipschitz gradient with constant  $L - s$ . By convexity we have:

$$g(x) \geq g(y) + \langle g'(y), x - y \rangle + \frac{1}{2L} \|g'(x) - g'(y)\|^2.$$

Now replacing  $g$  with  $f$ :

$$f(x) - \frac{s}{2} \|x\|^2 \geq f(y) - \frac{s}{2} \|y\|^2 + \langle f'(y) - sy, x - y \rangle + \frac{1}{2(L-s)} \|f'(x) - sx - f'(y) + sy\|^2.$$

Note that

$$\begin{aligned}
\frac{1}{2(L-s)} \|f'(x) - sx - f'(y) + sy\|^2 &= \frac{1}{2(L-s)} \|f'(x) - f'(y)\|^2 + \frac{s^2}{2(L-s)} \|y - x\|^2 \\
&\quad - \frac{s}{(L-s)} \langle f'(x) - f'(y), y - x \rangle,
\end{aligned}$$

so:

$$\begin{aligned}
f(x) &\geq f(y) + \langle f'(y), x - y \rangle + \frac{1}{2(L-s)} \|f'(x) - f'(y)\|^2 + \frac{s^2}{2(L-s)} \|y - x\|^2 \\
&\quad + \frac{s}{2} \|x\|^2 - \frac{s}{2} \|y\|^2 + \frac{s}{(L-s)} \langle f'(x) - f'(y), y - x \rangle - s \langle y, x - y \rangle.
\end{aligned}$$

Now using:

$$\frac{s}{2} \|x\|^2 - s \langle y, x \rangle = -\frac{s}{2} \|y\|^2 + \frac{s}{2} \|x - y\|^2,$$

we get:

$$\begin{aligned}
f(x) &\geq f(y) + \langle f'(y), x - y \rangle + \frac{1}{2(L-s)} \|f'(x) - f'(y)\|^2 + \frac{s^2}{2(L-s)} \|x - y\|^2 \\
&\quad - s \|y\|^2 + \frac{s}{2} \|x - y\|^2 + \frac{s}{(L-s)} \langle f'(x) - f'(y), y - x \rangle + s \langle y, y \rangle
\end{aligned}$$

Note the norm  $y$  terms cancel, and:

$$\begin{aligned}
\frac{s}{2} \|x - y\|^2 + \frac{s^2}{2(L-s)} \|x - y\|^2 &= \frac{(L-s)s + s^2}{2(L-s)} \|x - y\|^2 \\
&= \frac{sL}{2(L-s)} \|x - y\|^2.
\end{aligned}$$

So:

$$\begin{aligned}
f(x) &\geq f(y) + \langle f'(y), x - y \rangle + \frac{1}{2(L-s)} \|f'(x) - f'(y)\|^2 + \frac{sL}{2(L-s)} \|y - x\|^2 \\
&\quad + \frac{s}{(L-s)} \langle f'(x) - f'(y), y - x \rangle
\end{aligned}$$

□

**Corollary 11.** Take  $f(x) = \frac{1}{n} \sum_i f_i(x)$ , with the big data condition holding with constant  $\beta$ . Then for any  $x$  and  $\phi_i$  vectors:

$$\begin{aligned}
f(x) &\geq \frac{1}{n} \sum_i f_i(\phi_i) + \frac{1}{n} \sum_i \langle f'_i(\phi_i), x - \phi_i \rangle + \frac{\beta}{2sn^2} \sum_i \|f'_i(x) - f'_i(\phi_i)\|^2 \\
&\quad + \frac{\beta L}{2n^2} \sum_i \|x - \phi_i\|^2 + \frac{\beta}{n^2} \sum_i \langle f'_i(x) - f'_i(\phi_i), \phi_i - x \rangle.
\end{aligned}$$

*Proof.* We apply Lemma 10 to each  $f_i$ , but instead of using the actual constant  $L$ , we use  $\frac{sn}{\beta} + s$ , which under the big data assumption is larger than  $L$ :

$$f_i(x) \geq f_i(\phi_i) + \langle f'_i(\phi_i), x - \phi_i \rangle + \frac{\beta}{2sn} \|f'_i(x) - f'_i(\phi_i)\|^2 + \frac{\beta L}{2n} \|x - \phi_i\|^2 + \frac{\beta}{n} \langle f'_i(x) - f'_i(\phi_i), \phi_i - x \rangle.$$

Averaging over  $i$  gives the result. □

### 3 Lower complexity bounds

In this section we use the following technical assumption, as used in Nesterov (1998):

*Assumption 1:* An optimization method at step  $k$  may only invoke the oracle with a point  $x^{(k)}$  that is of the form:

$$x^{(k)} = x^{(0)} + \sum_i a_i g^{(i)},$$

where  $g^{(i)}$  is the derivative returned by the oracle at step  $i$ , and  $a_i \in R$ .

This assumption prevents an optimization method from just guessing the correct solution without doing any work. Virtually all optimization methods fall into under this assumption.

#### Simple $(1 - \frac{1}{n})^k$ bound

Any procedure that minimizes a sum of the form  $f(w) = \frac{1}{n} \sum_i f_i(w)$  by uniform random access of  $f_i$  is restricted by the requirement that it has to actually see each term at least once in order to find the minimum. This leads to a  $(1 - \frac{1}{n})^k$  rate in expectation. We now formalize such an argument. We will work in  $R^n$ , matching the dimensionality of the problem to the number of terms in the summation.

**Theorem 12.** For any  $f \in FS_{1,n,n}^{1,1}(R^n)$ , we have that a  $k$  step optimization procedure gives:

$$E[f(w)] - f(w^*) \geq \left(1 - \frac{1}{n}\right)^k \left(f(w^{(0)}) - f(w^*)\right)$$

*Proof.* We will exhibit a simple worst-case problem. Without loss of generality we assume that the first oracle access by the optimization procedure is at  $w = 0$ . In any other case, we shift our space in the following argument appropriately.

Let  $f(w) = \frac{1}{n} \sum_i \left[ \frac{n}{2} (w_i - 1)^2 + \frac{1}{2} \|w\|^2 \right]$ . Then clearly the solution is  $w_i = \frac{1}{2}$  for each  $i$ , with minimum of  $f(w^*) = \frac{n}{4}$ . For  $w = 0$  we have  $f(0) = \frac{n}{2}$ . Since the derivative of each  $f_j$  is 0 on the  $i$ th component if we have not yet seen  $f_i$ , the value of each  $w_i$  remains 0 unless term  $i$  has been seen.

Let  $v^{(k)}$  be the number of unique terms we have not seen up to step  $k$ . Between steps  $k$  and  $k+1$ ,  $v$  decreases by 1 with probability  $\frac{v}{n}$  and stays the same otherwise. So

$$E[v^{(k+1)} | v^{(k)}] = v^{(k)} - \frac{v^{(k)}}{n} = \left(1 - \frac{1}{n}\right) v^{(k)}.$$

So we may define the sequence  $X^{(k)} = (1 - \frac{1}{n})^{-k} v^{(k)}$ , which is then martingale with respect to  $v$ , as

$$\begin{aligned} E[X^{(k+1)} | v^{(k)}] &= \left(1 - \frac{1}{n}\right)^{-k-1} E[v^{(k+1)} | v^{(k)}] \\ &= \left(1 - \frac{1}{n}\right)^{-k} v^{(k)} \\ &= X^{(k)}. \end{aligned}$$

Now since  $k$  is chosen in advance, stopping time theory gives that  $E[X^{(k)}] = E[X^{(0)}]$ . So

$$E\left[\left(1 - \frac{1}{n}\right)^{-k} v^{(k)}\right] = n,$$

$$\therefore E[v^{(k)}] = \left(1 - \frac{1}{n}\right)^k n.$$

By Assumption 1, the function can be at most minimized over the dimensions seen up to step  $k$ . The seen dimensions contribute a value of  $\frac{1}{4}$  and the unseen terms  $\frac{1}{2}$  to the function. So we have that:

$$\begin{aligned} E[f(w^{(k)})] - f(w^*) &\geq \frac{1}{4} (n - E[v^{(k)}]) + \frac{1}{2} E[v^{(k)}] - \frac{n}{4} \\ &= \frac{1}{4} E[v^{(k)}] \\ &= \left(1 - \frac{1}{n}\right)^k \frac{n}{4} \\ &= \left(1 - \frac{1}{n}\right)^k [f(w^{(0)}) - f(w^*)]. \end{aligned}$$

□

## Minimization of non-strongly convex finite sums

It is known that the class of convex, continuous & differentiable problems, with  $L$ -Lipschitz continuous derivatives  $F_L^{1,1}(R^m)$ , has the following lower complexity bound when  $k < m$ :

$$f(x^{(k)}) - f^{(k)}(x^*) \geq \frac{L \|x^{(0)} - x^*\|^2}{8(k+1)^2},$$

which is proved via explicit construction of a worst-case function where it holds with equality. Let this worst case function be denoted  $h^{(k)}$  at step  $k$ .

We will show that the same bound applies for the finite-sum case, on a per pass equivalent basis, by a simple construction.

**Theorem 13.** *The following lower bound holds for  $k$  a multiple of  $n$ :*

$$f(x^{(k)}) - f^{(k)}(x^*) \geq \frac{L \|x^{(0)} - x^*\|^2}{8(\frac{k}{n} + 1)^2},$$

when  $f$  is a finite sum of  $n$  terms  $f(x) = \frac{1}{n} \sum_i f_i(x)$ , with each  $f_i \in F_L^{1,1}(R^m)$ , and with  $m > kn$ , under the oracle model where the optimization method may choose the index  $i$  to access at each step.

*Proof.* Let  $h_i$  be a copy of  $h^{(k)}$  redefined to be on the subset of dimensions  $i + jn$ , for  $j = 1 \dots k$ , or in other words,  $h_i^{(k)}(x) = h^{(k)}([x_i, x_{i+n}, \dots, x_{i+jn}, \dots])$ . Then we will use:

$$f^{(k)}(x) = \frac{1}{n} \sum_i h_i^{(k)}(x)$$

as a worst case function for step  $k$ .

Since the derivatives are orthogonal between  $h_i$  and  $h_j$  for  $i \neq j$ , by Assumption 1, the bound on  $h_i^{(k)}(x^{(k)}) - h_i^{(k)}(x^*)$  depends only on the number of times the oracle has been invoked with index  $i$ , for each  $i$ . Let this be denoted  $c_i$ . Then we have that:

$$f(x^{(k)}) - f^{(k)}(x^*) \geq \frac{L}{8n} \sum_i \frac{\|x^{(0)} - x^*\|_{(i)}^2}{(c_i + 1)^2}.$$

Where  $\|\cdot\|_{(i)}^2$  is the norm on the dimensions  $i + jn$  for  $j = 1 \dots k$ . We can combine these norms into a regular Euclidean norm:

$$f(x^{(k)}) - f^{(k)}(x^*) \geq \frac{L \|x^{(0)} - x^*\|^2}{8n} \sum_i \frac{1}{(c_i + 1)^2}.$$

Now notice that  $\sum_i \frac{1}{(c_i + 1)^2}$  under the constraint  $\sum c_i = k$  is minimized when each  $c_i = \frac{k}{n}$ . So we have:

$$\begin{aligned} f(x^{(k)}) - f^{(k)}(x^*) &\geq \frac{L \|x^{(0)} - x^*\|^2}{8n} \sum_i \frac{1}{(\frac{k}{n} + 1)^2}, \\ &= \frac{L \|x^{(0)} - x^*\|^2}{8(\frac{k}{n} + 1)^2}, \end{aligned}$$

which is the same lower bound as for  $k/n$  iterations of an optimization method on  $f$  directly. □
